# Supplementary material for: Disruption of prepulse inhibition is associated with compulsive behavior severity and nucleus accumbens dopamine receptor changes in Sapap3 knockout mice
Source: PubMed Central journal article supplement (PMC8093235; doi:10.1038/s41598-021-88769-5), 2021-05-03
Supplement: 41598_2021_88769_MOESM1_ESM.pdf [file 41598_2021_88769_MOESM1_ESM.pdf]

1 **Disruption of prepulse inhibition is associated with severity of**  
2 **compulsive behavior and nucleus accumbens dopamine receptor**  
3 **changes in Sapap3 knockout mice**

4  
5 Elizabeth E Manning<sup>1</sup>; Abigail Y Wang<sup>1</sup>; Linda M Saikali<sup>1</sup>; Anna S Winner<sup>1</sup>; Susanne E Ahmari\*<sup>1</sup>

6  
7 <sup>1</sup>Department of Psychiatry, Translational Neuroscience Program, Center for Neuroscience  
8 Program, Center for Neural Basis of Cognition, University of Pittsburgh

9  
10 **Results**

11 **PPI and startle in Sapap3-KOs with and without lesions**

12 %PPI increased with increasing prepulse intensity similarly in WT and KO mice (main effect PP,  
13  $F_{(2,56)}=87.4$ ,  $p<0.0001$ ; main effect genotype:  $p=0.14$ , PP x genotype interaction  $p=0.86$ ; Figure  
14 S1A). Startle amplitude did not differ between the groups during the trial blocks used to  
15 calculate PPI (2 and 3) (main effect of group,  $p=0.43$ ; Figure S1B). However, there was a trend  
16 for differences in startle habituation between the groups (Figure S1C, group x block interaction  
17  $p=0.06$ ). KO-L showed a trend for reduced startle in block 1 (vs KO-NL and WT,  $p<0.06$ ,  
18  $t_{108}>2.3$ ) and stable startle across the 4 blocks, whereas WT and KO-NL showed typical startle  
19 habituation. The amplitude of movement detected during trials when no stimulus was presented  
20 was reduced in both KO groups relative to WT (Figure S1D,  $F_{(2,27)}=8.6$ ,  $p=0.001$ ). Bodyweight

- 1 was also reduced in KOs relative to WT, although this effect was most pronounced in KO-L,
- 2 which were significantly lighter than both WT and KO-NL (Figure S1E,  $F_{(2,27)}=28.5$ ,  $p<0.0001$ ).

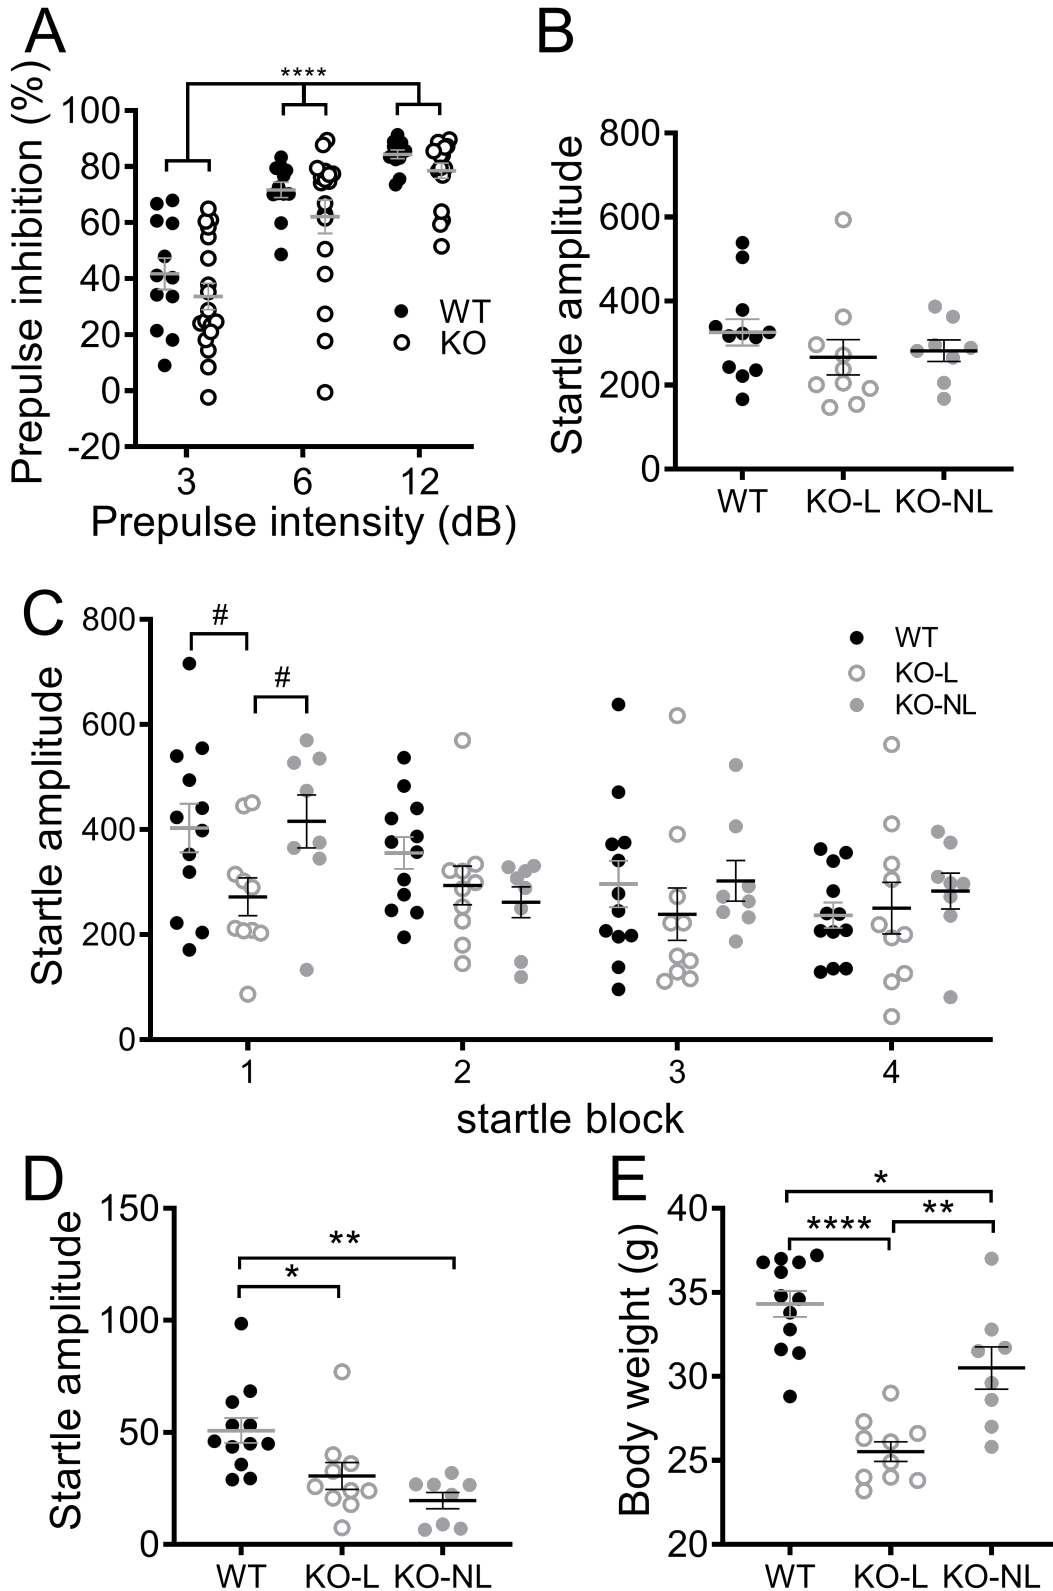

1 **Figure S1.** PPI and startle in Sapap3-KOs with and without lesions. **A)** PPI increases with  
2 increasing prepulse magnitude to a similar extent in WT and KO mice. **B)** Startle amplitude  
3 during 120dB pulse only trials in blocks 2/3 (used to calculate %PPI) does not differ between  
4 WT, KO-L and KO-NL. **C)** A trend was observed towards altered habituation to startling stimulus  
5 (120dB pulse only trials) between groups across 4 blocks of testing ( $p=0.058$ ). Post-hoc tests  
6 demonstrated that this trend was driven by the KO-L group, which showed reduced startle  
7 during the first block relative to the other groups ( $t_{(108)}>2.3$ ,  $p<0.06$ ), and an attenuation of  
8 habituation across the subsequent blocks relative to WT and KO-NL (block 1 vs block 4: KO-L,  
9  $p>0.99$ ; KO-NL  $t_{(81)}=2.7$ ,  $p=0.045$ ; WT  $t_{(81)}=4.2$ ,  $p=0.0004$ ). **D)** Movement detected during “no  
10 stimulus” trials was reduced in KO-L and KO-NL relative to WT (KO-L vs WT  $t_{(27)}=2.8$ ,  $p=0.03$ ,  
11 KO-NL vs WT  $t_{(27)}=4.0$ ,  $p=0.0014$ ), but did not differ between KO-L and KO-NL ( $p=0.57$ ). **E)**  
12 Body weight was reduced in KO-L and KO-NL relative to WT (KO-L vs WT  $t_{(27)}=7.5$ ,  $p<0.001$ ,  
13 KO-NL vs WT  $t_{(27)}=3.0$ ,  $p=0.014$ ). KO-L also showed lower body weight relative to KO-NL  
14 ( $t_{(27)}=3.9$ ,  $p=0.0019$ ). In panel A, \* indicates main effect of prepulse intensity, in panel C-E \*/#  
15 indicates results of Bonferroni post-hoc tests. \*\*\*\*  $p<0.0001$ ; \*\* $p<0.01$ , \* $p<0.05$ , #  $0.1>p>0.05$ .  
16  $n=14$  WT, 18 KO (10 KO-L, 8 KO-NL). KO= knockout, KO-L= KOs with lesions, KO-NL= KOs  
17 without lesions, WT= wild-type.

18

### 19 **Unbiased clustering of PPI and grooming in Sapap3-KO mice**

20 To further examine behavioral heterogeneity in Sapap3-KOs, unbiased clustering was  
21 performed to determine whether distinct phenotype groups emerged (Figure S2). A three-cluster  
22 solution identified 2 clusters with high grooming (one-way ANOVA grooming:  $F_{(2, 15)}=82.0$ ,  
23  $p<0.0001$ ), one with impaired PPI (one-way ANOVA PPI:  $F_{(2, 15)}=24.3$ ,  $p<0.0001$ ; cluster 1:  $n=6$ ,  
24 all KO-L) and one with relatively intact PPI (cluster 2:  $n=5$ , including 1 KO-NL). A third cluster of  
25 unimpaired mice was also identified (cluster 3  $n=7$ , all KO-NL).

26



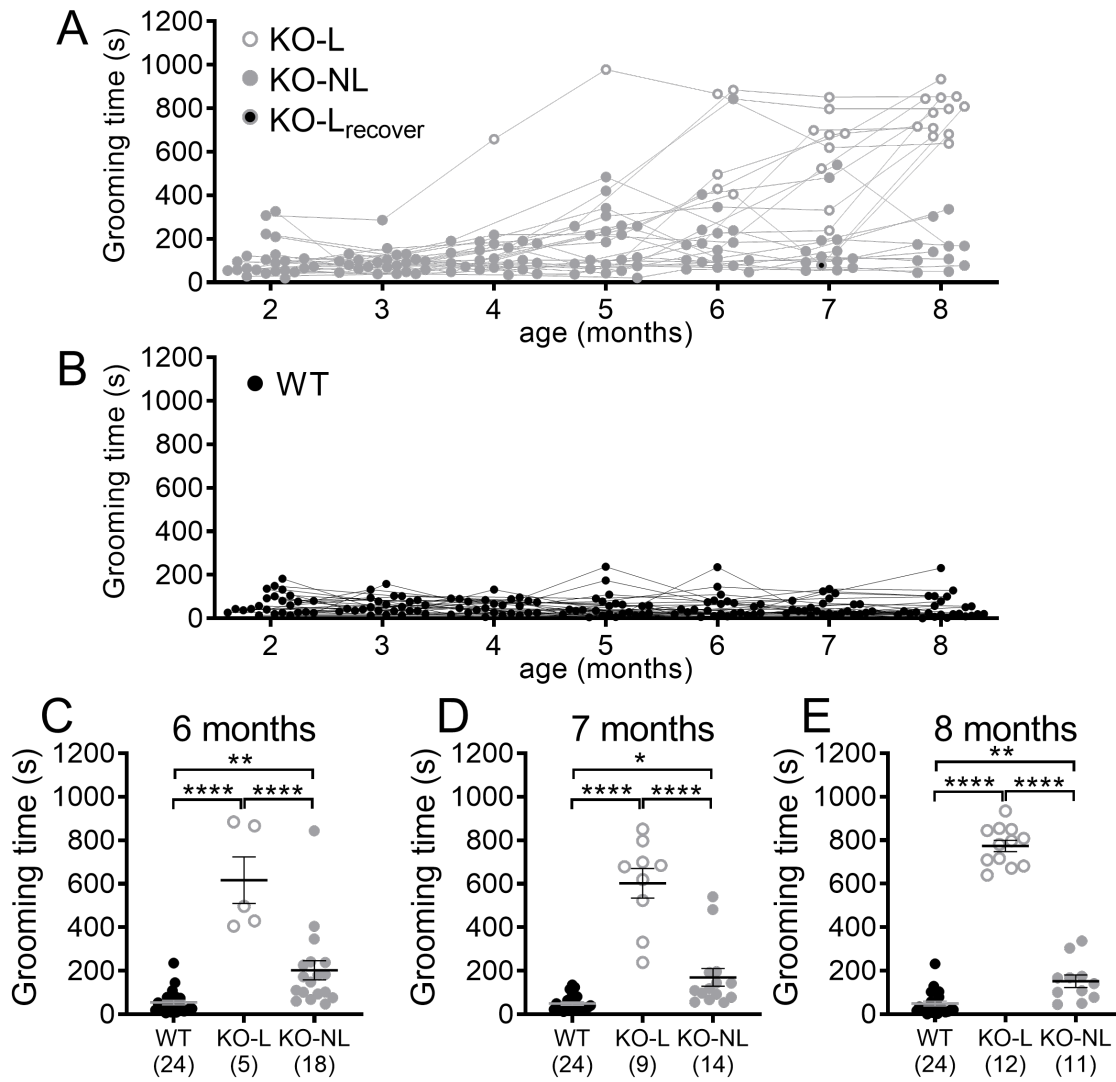

1  
 2 **Figure S3:** Longitudinal progression of grooming phenotype. **A)** Grooming trajectories for  
 3 individual Sapap3-KO mice across the longitudinal study is plotted, showing a single instance  
 4 when a KO-L mouse recovered to be re-classified to KO-NL in a subsequent month (designated  
 5 KO-L<sub>recover</sub>, it was later classified to KO-L at 8 months of age). **B)** Grooming trajectories for WT  
 6 mice show no substantial changes over the same period. Grooming was increased in KO-L  
 7 relative to WT and KO-NL, and KO-NL relative to WT, from 6-8 months of age (**C-E**). \* indicates  
 8 results of Bonferroni post-hoc test, \*  $p < 0.05$ , \*\*  $p < 0.01$ , \*\*\*\*  $p < 0.0001$ .  $n = 24$  WT, 23 KO. KO=  
 9 knockout, KO-L= KOs with lesions, KO-NL= KOs without lesions, WT= wild-type.

10

1 **Early grooming phenotype**

2 Assessment of post-weaning grooming phenotype from 3-8 weeks of age revealed a significant  
3 age dependent difference in grooming in Sapap3-KOs (Figure S4; age x genotype interaction,  
4  $F_{(5,160)}=8.5$ ,  $p<0.0001$ ). Post-hoc tests revealed that grooming was increased in WT relative to  
5 KO at 3 weeks of age, whereas grooming was increased in KO relative to WT at 7-8 weeks of  
6 age.

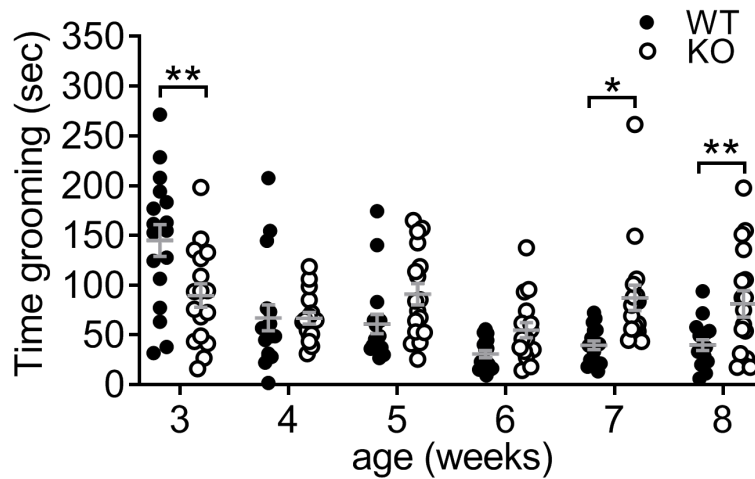

7 **Figure S4.** Early progression of grooming phenotype in Sapap3-KO mice. The early  
8 progression of the grooming phenotype was examined during the first month of life after  
9 weaning (3-8 weeks of age). Data from 8 weeks has been published elsewhere<sup>1</sup>. There were  
10 time-dependent differences in grooming between the genotypes. Post-hoc tests demonstrated  
11 that WTs showed elevated grooming at 3 weeks of age relative to KOs ( $t_{(192)}=3.8$ ,  $p=0.0011$ ),  
12 whereas at 7 and 8 weeks of age grooming was elevated in Sapap3-KOs (7 weeks,  $t_{(192)}=3.3$ ,  
13  $p=0.007$ ; 8 weeks,  $t_{(192)}=2.9$ ,  $p=0.029$ ). \* indicates results of Bonferroni post-hoc test, \*  $p<0.05$ ,  
14 \*\* $p<0.01$ .  $n=17$  WT (9 males), 15 KO (7 males). KO = knockout, WT= wild-type mice.

15

16 **Longitudinal progression of changes in PPI and startle in Sapap3-KO mice,**

17 PPI significantly increased across 2-8 months of age in both groups (Figure S5A;  $F_{(6, 270)}=29.2$ ,  
18  $p<0.0001$ ), and there was a trend for a reduction in PPI in Sapap3-KOs compared to WTs  
19 across 2-8 months of age ( $p=0.095$ ). However, there were significant age-dependent

1 differences in startle between the genotypes (Figure S5B; interaction  $p=0.001$ ), with Sapap3-  
 2 KOs showing reduced startle relative to WT between 2-5 months of age. Therefore, PPI could  
 3 only be reliably compared between WT, KO-NL, and KO-L between 6-8 months of age when  
 4 startle was comparable between the groups (Figure S5C-E; one-way ANOVA comparing  
 5 groups: 6 months  $p=0.13$ , 7 months  $p=0.65$ , 8 months  $p=0.18$ ).

6

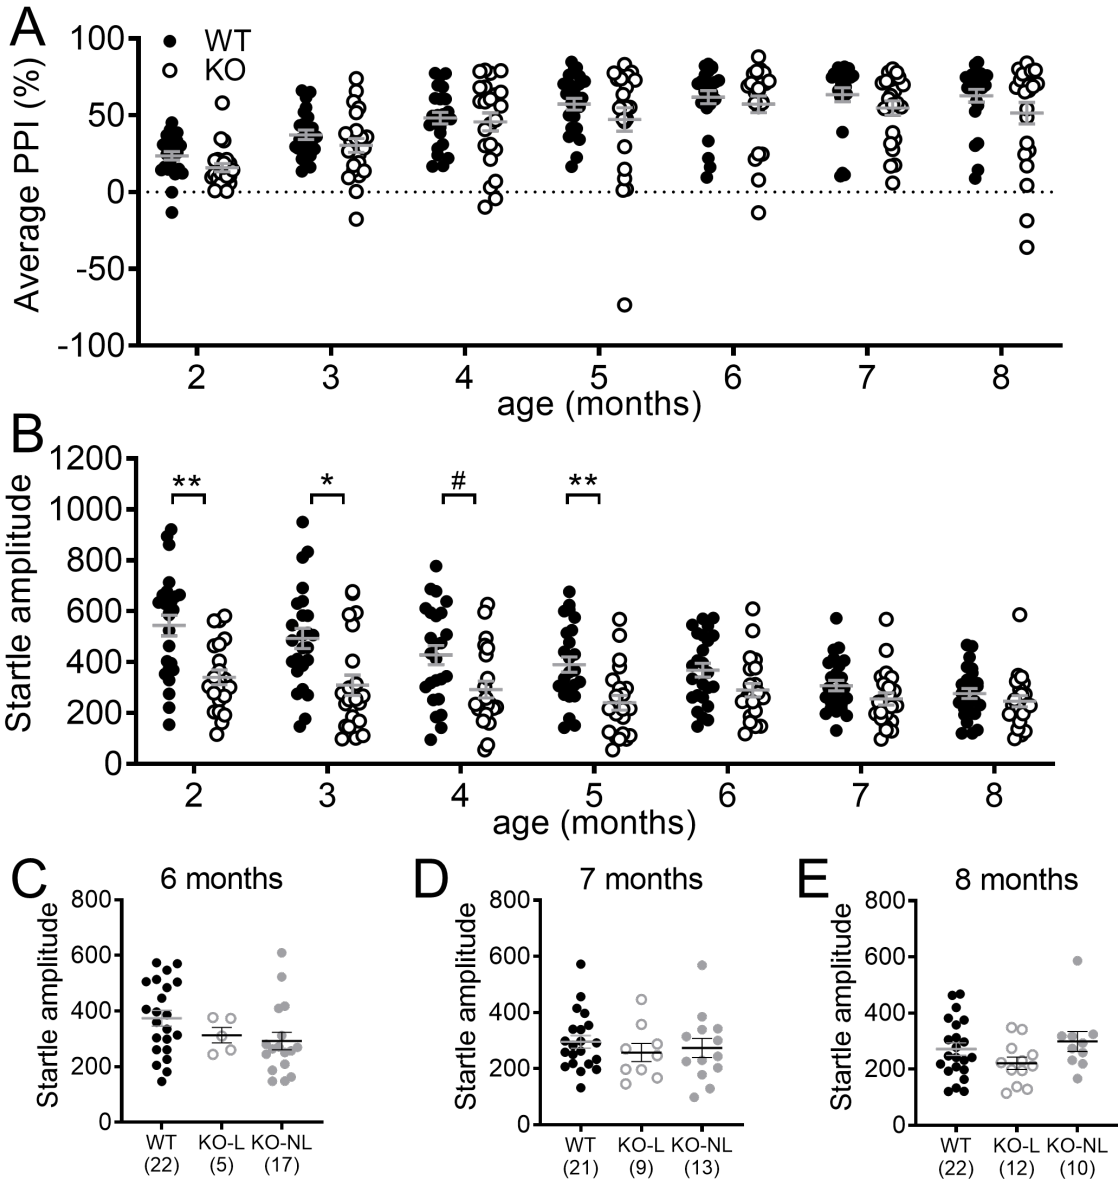

1 **Figure S5:** Longitudinal progression of changes in PPI, startle and grooming in Sapap3-KO  
2 mice. **A)** PPI significantly increased across 2-8 months of age in both groups. There was a trend  
3 for a reduction in PPI in Sapap3-KOs compared to WT's across 2-8 months of age ( $p=0.095$ ). **B)**  
4 There were significant age-dependent differences in startle between the genotypes (interaction  
5  $p=0.001$ ), with Sapap3-KOs showing reduced startle relative to WT from 2-5 months of age.  
6 Therefore, PPI could only be reliably compared between WT, KO-NL and KO-L from 6-8 months  
7 of age when startle was comparable between the groups. Importantly, when KOs were  
8 separated into KO-L and KO-NL, startle was not significantly different from WT between 6-8  
9 months of age (**C-E**). \* indicates results of Bonferroni post-hoc test, #  $0.05 < p < 0.10$ , \*  $p < 0.05$ , \*\*  
10  $p < 0.01$ . Note, for panels A,B all mice are included ( $n=24$  WT, 23 KO), whereas for panels C-E  
11 mice excluded from PPI analysis have been removed, resulting in different group sizes. KO=  
12 knockout, KO-L= KOs with lesions, KO-NL= KOs without lesions, WT= wild-type, PPI= prepulse  
13 inhibition.

14

## 15 **Relationship between grooming and PPI in longitudinal cohort**

16 PPI was significantly correlated with grooming at 8 months of age (Figure S6C;  $R=-0.59$ ,  
17  $p=0.0036$ ), but not 6-7 months of age (Figure S6A-B; 7 months:  $R=-0.12$ , 6 months:  $R=0.09$ ).  
18 Unbiased clustering on data from 8 month old mice replicated findings from Figure S2, revealing  
19 3 KO sub-types that differed in grooming and PPI (Figure S7A-B; grooming: one-way ANOVA,  
20  $F_{(2, 19)}=137.2$ ,  $p < 0.0001$ ; PPI: one-way ANOVA,  $F_{(2, 19)}=42.8$ ,  $p < 0.0001$ ). For this cohort, all  
21 lesioned animals were classified to cluster 1 ( $n=6$ ) and 2 ( $n=6$ ) and all non-lesioned animals  
22 were classified to cluster 3 ( $n=10$ ).

23



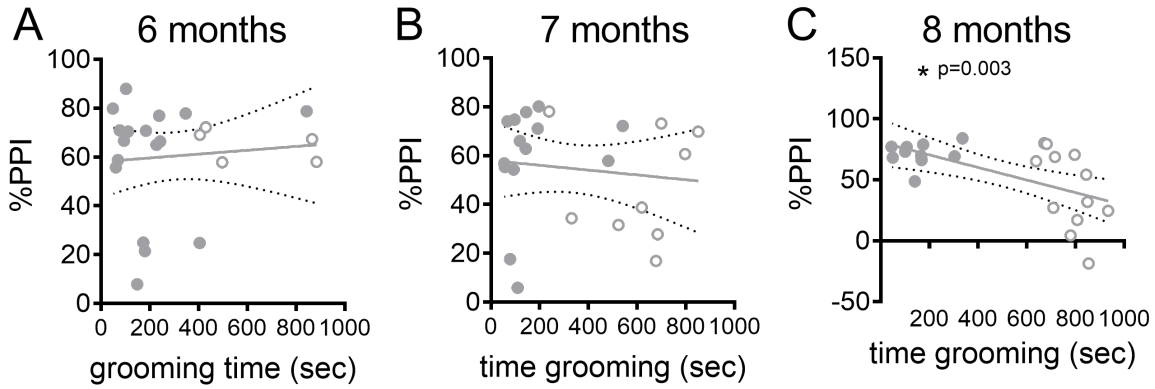

1

2 **Figure S6:** Correlation between PPI and grooming in longitudinal cohort. **A-B)** At 6 months of  
 3 age, PPI was not correlated with grooming in Sapap3-KOs. **C)** At 8 months of age, PPI was  
 4 negatively correlated with grooming, similar to Figure 1C (independent cohort). n=22 KO mice.

5

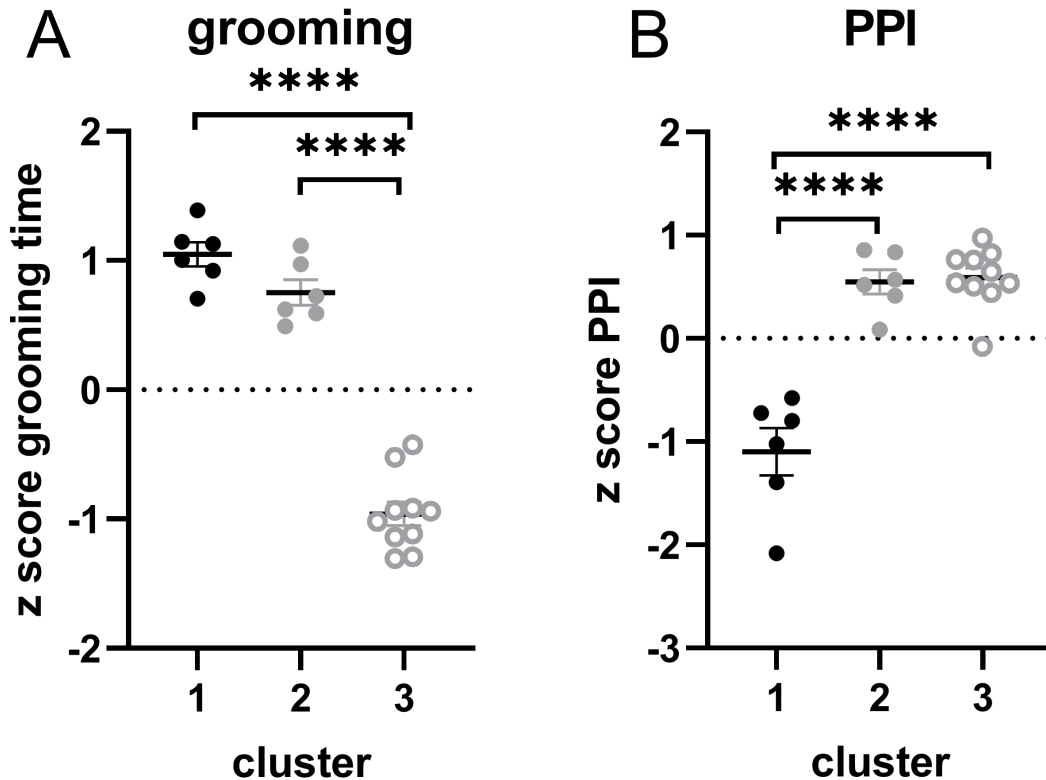

6 **Figure S7:** Unbiased clustering of OCD-relevant behaviours in Sapap3-KOs from 8 months  
 7 age timepoint in longitudinal cohort. **A)** Grooming was significantly increased in cluster 1 and 2  
 8 relative to cluster 3. **B)** PPI was significantly impaired in cluster 1 relative to clusters 2 and 3. . \*  
 9 indicates significant Bonferroni post-hoc test comparing clusters, \*\*\*\* p<0.0001. n=22 KO mice.

1

2 **Representative images of total binding and non-specific binding sections for**  
3 **autoradiography assays**

4 Receptor binding was calculated by measuring luminosity in striatal regions of interest (Figure  
5 S8B) on total binding (TB) and nonspecific binding (NSB) slides (Figure S8A for representative  
6 images). These values were then converted to radioactivity (uCi/g) using a tritium standard  
7 curve, and NSB radioactivity was subtracted from TB radioactivity to give specific  
8 receptor/transporter binding value.

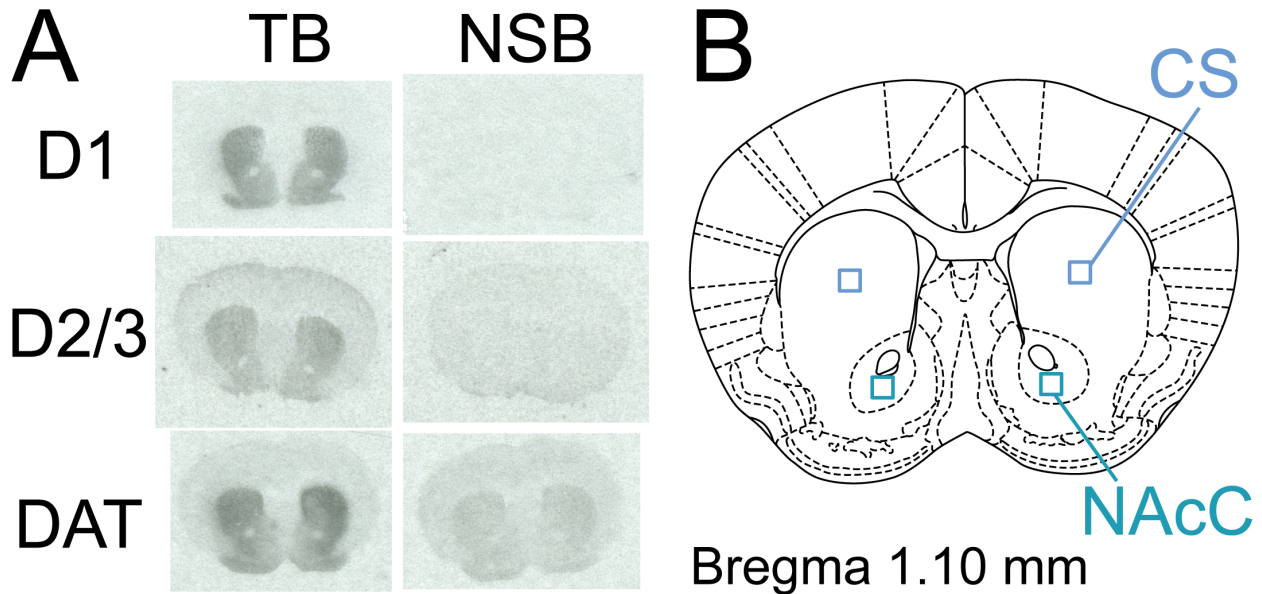

9 **Figure S8.** Representative autoradiography images and regions of interest. **A)** Representative  
10 TB and adjacent NSB autoradiographs from striatum for D1 receptor, D2/3 receptor, and DAT  
11 binding. **B)** Schematic diagram of coronal section with positioning of regions of interest used for  
12 quantification. CS= central striatum, NAcC= Nucleus accumbens core, DAT= dopamine  
13 transporter, TB= total binding, NSB= non-specific binding.

14

1 **No sex differences in disruption of PPI or compulsive grooming in Sapap3-KO**  
2 **mice**

3 Male and female mice were used in experiment 3. The data from these studies were  
4 used to investigate sex differences, given recent observations that PPI was disrupted in female  
5 OCD patients relative to healthy controls, but not in males<sup>2</sup>. In experiment 3, at 8 months of age  
6 there were no effects of sex (Figure S9A, main effect of group  $F_{(2,38)}=6.6$ ,  $p=0.003$ , main effect  
7 of sex,  $p=0.71$ , sex x group interaction  $p=0.82$ ). Planned Bonferroni post-hoc tests were  
8 performed to compare the groups in each sex separately, and although this analysis was  
9 underpowered it supported disruption of PPI in KO-L of both sexes (Figure S9A: male KO-L vs  
10 WT,  $t_{(38)}=2.2$ ,  $p=0.0921$ , KO-L vs KO-NL  $t_{(38)}=2.5$ ,  $p=0.045$ ; female KO-L vs WT,  $t_{(38)}=2.5$ ,  
11  $p=0.05$ ; for all other comparisons  $p>0.20$ ). Severity of compulsive grooming phenotype also did  
12 not differ between the sexes (Figure S9B; main effect of group,  $p<0.0001$ ; main effect of sex,  
13  $p=0.948$ , interaction  $p=0.509$ ).

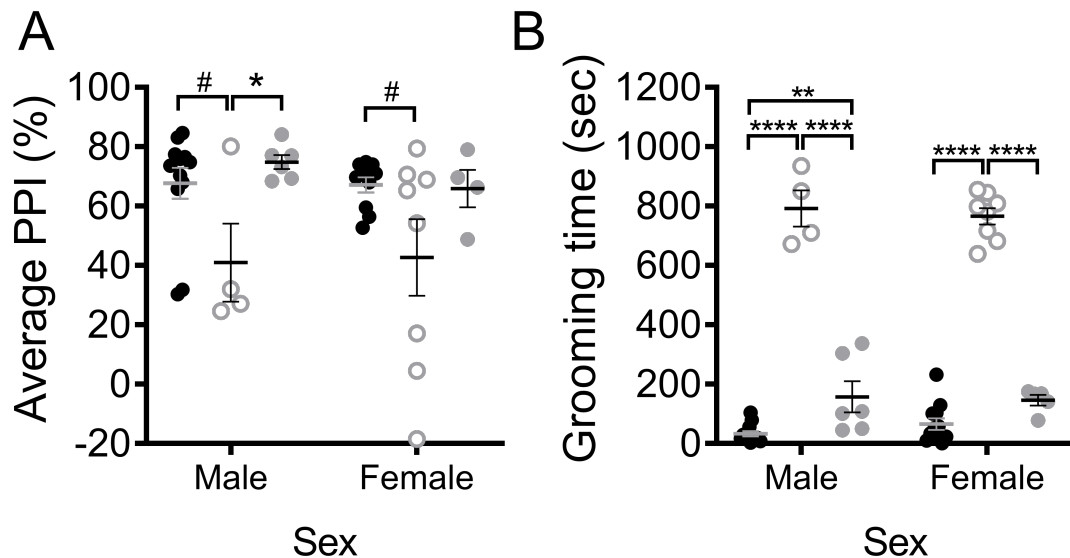

14  
15 **Figure S9.** No sex differences in disruption of PPI or compulsive grooming in Sapap3-KO mice.  
16 **A)** Data from 8 month old mice from the longitudinal testing cohort (experiment 3) showed no

1 evidence for sex differences in disruption of PPI. **B)** Compulsive grooming severity from  
2 experiment 3 also showed no evidence for sex differences. \* indicates significant Bonferroni  
3 post-hoc test. #  $0.1 > p > 0.05$ ; \*  $p < 0.05$ , \*\*  $p < 0.01$ , \*\*\*\*  $p < 0.0001$ . male: n=4 KO-L, 6KO-NL, 12  
4 WT; female: n= 8 KO-L, 4 KO-NL, 10 WT. KO-L= KO mice with lesions, KO-NL= knockout mice  
5 without lesions, WT= wild-type, PPI= prepulse inhibition.

6

## 7 **Discussion**

### 8 **Detection of early changes in PPI and grooming in KOs**

9 PPI could not be reliably compared between Sapap3-KOs and WT at early ages due to  
10 differences in startle amplitude. Therefore future studies may seek to “titrate” startle intensity  
11 between the groups (i.e. use lower intensity acoustic stimulus to induce startle in WT mice) so  
12 that startle is similar between the groups, allowing for more reliable comparison of PPI at earlier  
13 ages during the emergence of compulsive grooming in Sapap3-KOs<sup>3</sup>.

14

15 In the longitudinal study (experiment 3), we were unable to replicate the findings of  
16 experiment 4 demonstrating an increase in grooming in Sapap3-KO mice at 8 weeks/2 months  
17 of age. Instead, we first saw grooming-related genotype differences emerge at 4 months of age.  
18 Detection of the earliest, mildest grooming phenotype may therefore be dependent on regular  
19 testing and handling, which may be the cause of lower variance and lower mean levels of  
20 grooming in WT control mice in experiment 4 (weekly testing during experiment 4: 8 weeks of  
21 age WT mean = 39.7, SD= 22.5; monthly testing during experiment 3: 2 months of age WT  
22 mean= 67.0, SD= 47.4).

23

1 **Table S1: reagents and conditions used for autoradiography**

| Receptor | Ligand                                    | Ligand concentrations |         | Binding conditions |        |                                   |                                                                                                                                                       | NSB                                | Exposure time |
|----------|-------------------------------------------|-----------------------|---------|--------------------|--------|-----------------------------------|-------------------------------------------------------------------------------------------------------------------------------------------------------|------------------------------------|---------------|
|          |                                           | M                     | Ci/mmol | Temp               | Time   | Inhibitors                        | Buffer                                                                                                                                                |                                    |               |
| D1       | [ <sup>3</sup> H]-SCH 23390 <sup>1</sup>  | 2nM                   | 81.9    | RT                 | 1 hr   | 1μM Ketanserin <sup>2</sup>       | 50mM Tris-HCl <sup>2</sup> , 1mM MgCl <sub>2</sub> <sup>2</sup> , 120mM NaCl <sup>2</sup> , 2mM CaCl <sub>2</sub> <sup>2</sup> , 5mM KCl <sup>2</sup> | 10μM cis-flupenthixol <sup>2</sup> | 3.5 weeks     |
| D2/3     | [ <sup>3</sup> H]-Raclopride <sup>1</sup> | 5nM                   | 73.8    | RT                 | 1.5 hr | None                              | Same as D1                                                                                                                                            | 10μM Haloperidol <sup>2</sup>      | 7.5 weeks     |
| DAT      | [ <sup>3</sup> H]-GBR 12935 <sup>1</sup>  | 2nM                   | 41.3    | 4°C                | 20 hrs | 1μM cis-Flupenthixol <sup>2</sup> | 50mM HNa <sub>2</sub> PO <sub>4</sub> <sup>2</sup> , 70mM NaCl <sup>2</sup> , 0.025% BSA <sup>2</sup>                                                 | 10μM Mazindol <sup>2</sup>         | 3 weeks       |

2 Superscript indicates chemical manufacturer, with <sup>1</sup>= Perkin Elmer (Boston, MA), <sup>2</sup>= Sigma Aldrich (St Louis, MO), BSA= Bovine

3 Serum Albumin, RT = Room temperature (~25°C), DAT= dopamine transporter.

4

1 **References**

2 1 Corbit, V. L., Manning, E. E., Gittis, A. H. & Ahmari, S. E. Strengthened Inputs from  
3 Secondary Motor Cortex to Striatum in a Mouse Model of Compulsive Behavior. *The*  
4 *Journal of neuroscience : the official journal of the Society for Neuroscience* **39**, 2965-  
5 2975, doi:10.1523/JNEUROSCI.1728-18.2018 (2019).  
6 2 Steinman, S. A. *et al.* Prepulse Inhibition Deficits Only in Females with Obsessive-  
7 Compulsive Disorder. *Depression and anxiety* **33**, 238-246, doi:10.1002/da.22474  
8 (2016).  
9 3 Young, J. W., Wallace, C. K., Geyer, M. A. & Risbrough, V. B. Age-associated  
10 improvements in cross-modal prepulse inhibition in mice. *Behavioral neuroscience* **124**,  
11 133-140, doi:10.1037/a0018462 (2010).  
12
